# Supplementary material for: Mining complex bacteria media for all fluorinated compounds made possible by using HPLC coupled parallel to fluorine-specific and molecular specific detection
Source: Royal Society of Chemistry journal article supplement (doi:10.1039/c3ja50086a), 2013-01-01
Supplement: c3ja50086a.pdf [file c3ja50086a.pdf]

# Supporting Information

## Screening for traces fluorine containing species in complex media made possible by using HPLC coupled parallel to fluorine-specific and molecular specific detection

Zhiwei Qin<sup>a</sup>, Andrea Raab<sup>a,b</sup>, Eva M Krupp<sup>a,b</sup>, Hai Deng<sup>\*,a</sup>, Joerg Feldmann<sup>\*,a,b</sup>

<sup>a</sup> Trace Element Speciation Laboratory (TESLA), Department of Chemistry, University of Aberdeen, Aberdeen, AB24 3UE, Scotland, U.K. Fax: +441224272921, Tel: +441224272953, email: [j.feldmann@abdn.ac.uk](mailto:j.feldmann@abdn.ac.uk)

<sup>b</sup> Marine Biodiscovery Centre (MBC), Department of Chemistry, University of Aberdeen, Aberdeen, AB24 3UE, Scotland, U.K. email: [h.deng@abdn.ac.uk](mailto:h.deng@abdn.ac.uk)

HPLC\_MAS chromatogram formation.

To obtain the RP C8 or Ion Exchange HPLC-MAS chromatogram, fractions eluted by HPLC were collected once per 30s within a certain retention time. Fractions were then placed in the autosampler of the CS-MAS and subsequently measured for fluorine content. Hence the fluoro metabolites separated by HPLC under the particular eluting time could be detected by CS-MAS, the chromatogram could then be established by the CS-MAS absorptions against their retention times.

**SI Table 1** Pretreatment and modifier solutions used for the formation of GaF

| Solution                                                                | Concentration                            | Function                                                                                      |
|-------------------------------------------------------------------------|------------------------------------------|-----------------------------------------------------------------------------------------------|
| Zr                                                                      | 1 g/L Zr                                 | Graphite tube coating                                                                         |
| Ga(NO <sub>3</sub> ) <sub>3</sub>                                       | 10 g/L Ga                                | GaF forming agent                                                                             |
| NaAc                                                                    | 1 g/L NaAc                               | Modifier for F stabilization                                                                  |
| Zr/Pa(NO <sub>3</sub> ) <sub>2</sub> /Mg(NO <sub>3</sub> ) <sub>2</sub> | 0.1% m/v Pd, 0.05% m/v Mg and 20 mg/L Zr | Modifiers for gallium stabilization and bonding of the free carbon from graphite tube surface |

**SI Table 2** Temperature program of graphite furnace for GaF detection

| Step | Name               | Temperature/°C | Ramp/°Cs <sup>-1</sup> | Hold/s |
|------|--------------------|----------------|------------------------|--------|
| 0    | Zr Coating         | Variable       | -                      | -      |
| 1    | Drying             | 75             | 7                      | 2      |
| 2    | Drying             | 85             | 2                      | 15     |
| 3    | Drying             | 95             | 3                      | 5      |
| 4    | Drying             | 350            | 300                    | 3      |
| 5    | Pretreatment       | 1100           | 500                    | 10     |
| 6    | Cooling down       | 85             | NP                     | 2      |
| 7    | Drying             | 85             | 0                      | 20     |
| 8    | Drying             | 95             | 3                      | 5      |
| 9    | Pyrolysis          | 550            | 300                    | 10     |
| 10   | Gas adaption       | 550            | 0                      | 5      |
| 11   | Molecule formation | 1150           | 1000                   | 7      |
| 12   | Cleaning           | 2450           | 500                    | 4      |

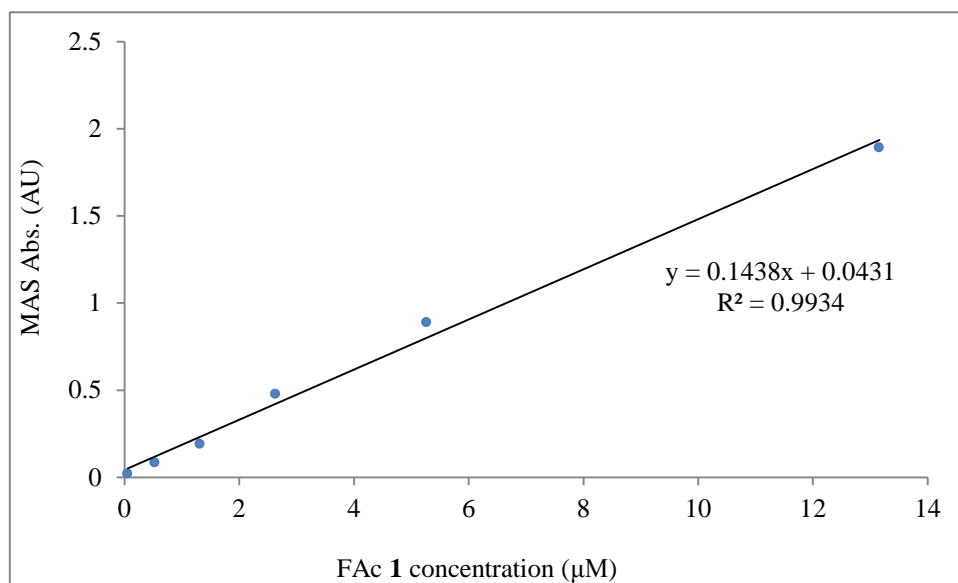

**SI Figure S1:** Calibration of sodium fluoroacetate. Average standard deviation across all points was 3.2% ( $n = 2$ ).

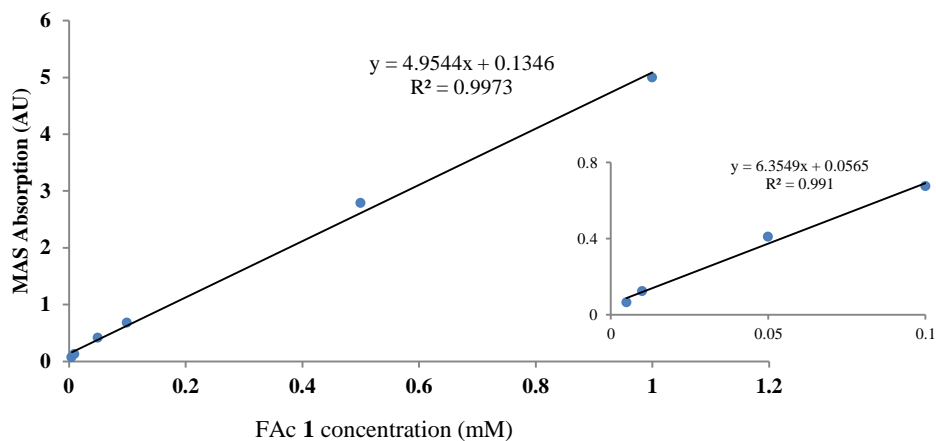

**SI Figure S2:** Calibration of sodium fluoroacetate after ion exchange chromatography. The blown-up insert indicates the calibration of lower concentrated sodium fluoroacetate after exchange chromatography. Average standard deviation across all points was 1.7% ( $n = 2$ ).

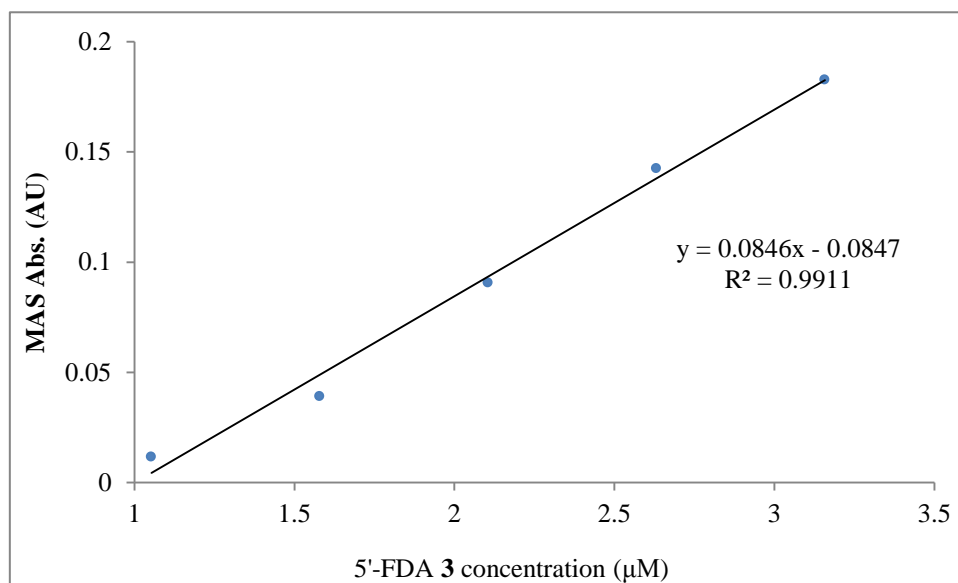

**SI Figure S3:** Calibration of 5'-FDA after the separation of reverse phase HPLC separation. Average standard deviation across all points was 1.4% ( $n = 2$ ).

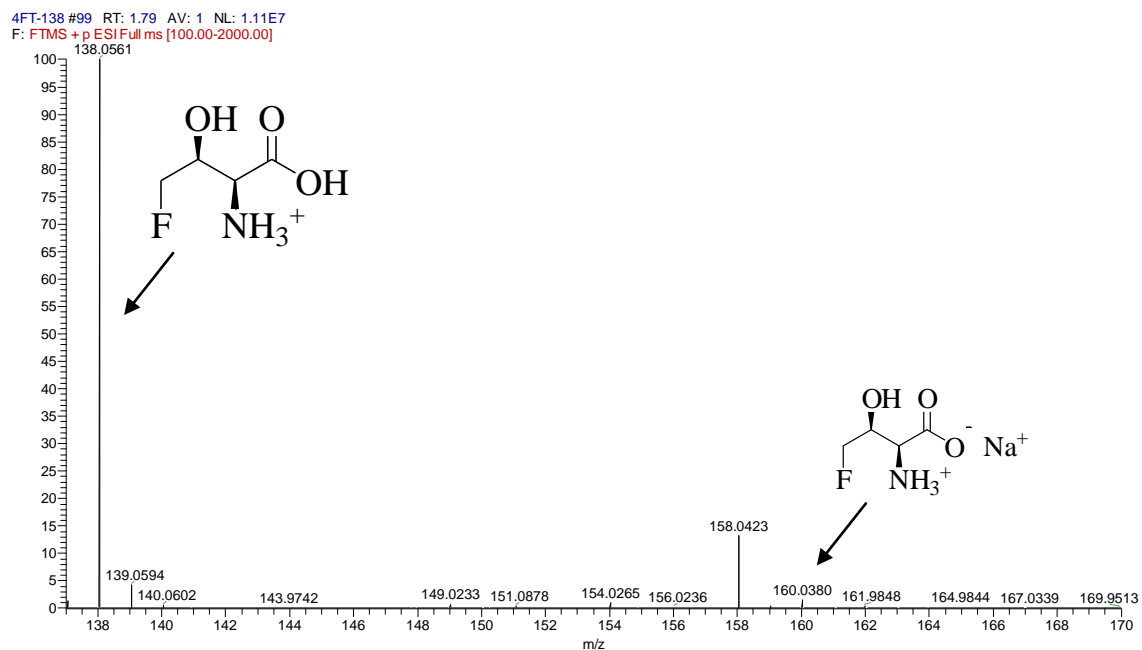

**SI Figure S4:** High resolution HPLC-ESMS analysis of the synthetic 4-FT 2.

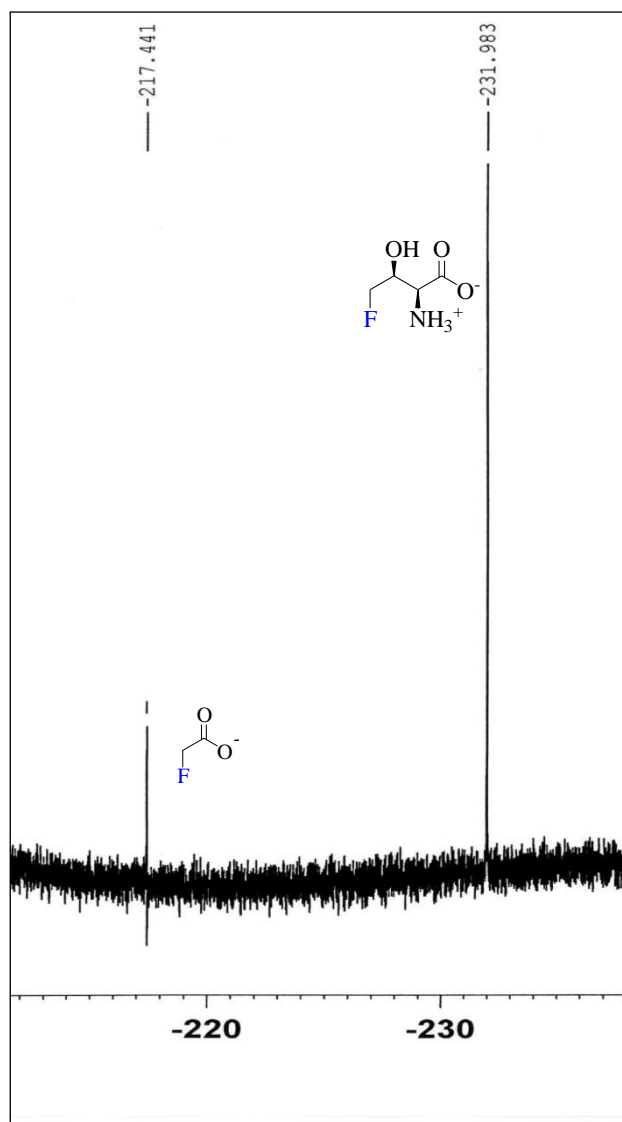

**SI Figure S5:**  $^{19}\text{F}$  NMR of FAc 1 and 4-FT 2

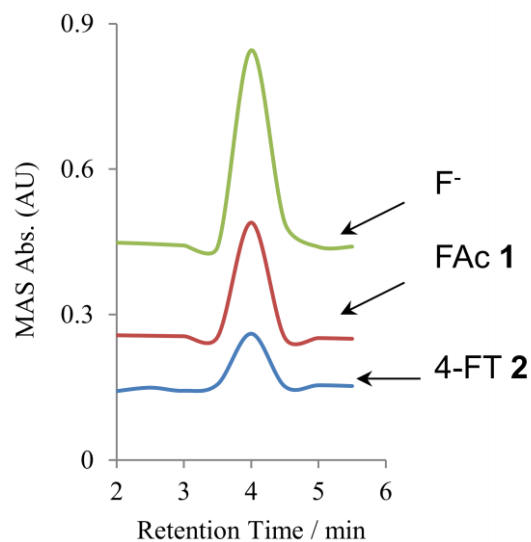

**SI Figure S6** CS-MAS identification of individual fluoride, FAc 1 and 4-FT 2 after RP HPLC separation

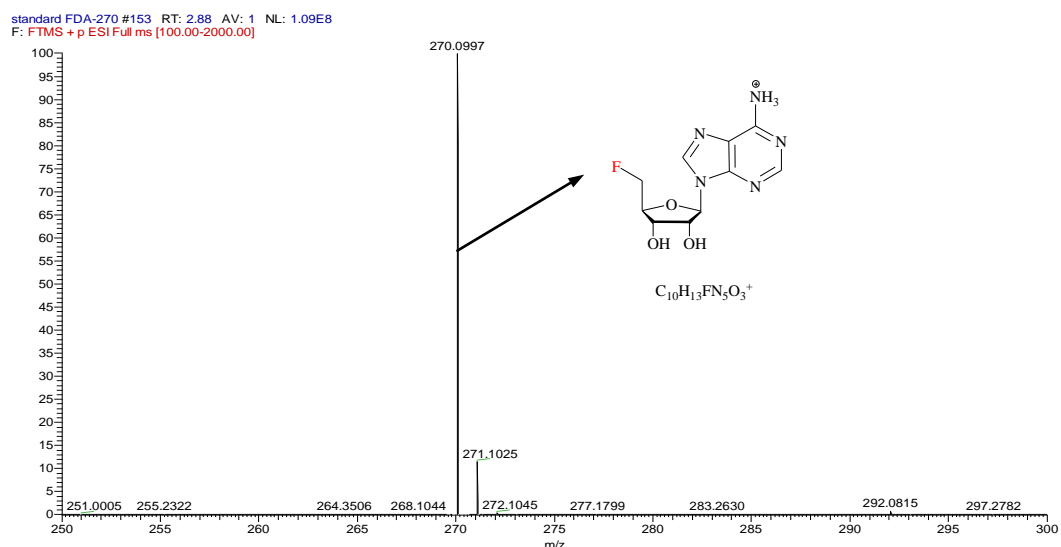

**SI Figure S7:** High resolution mass spectra of the synthetic 5'-FDA.

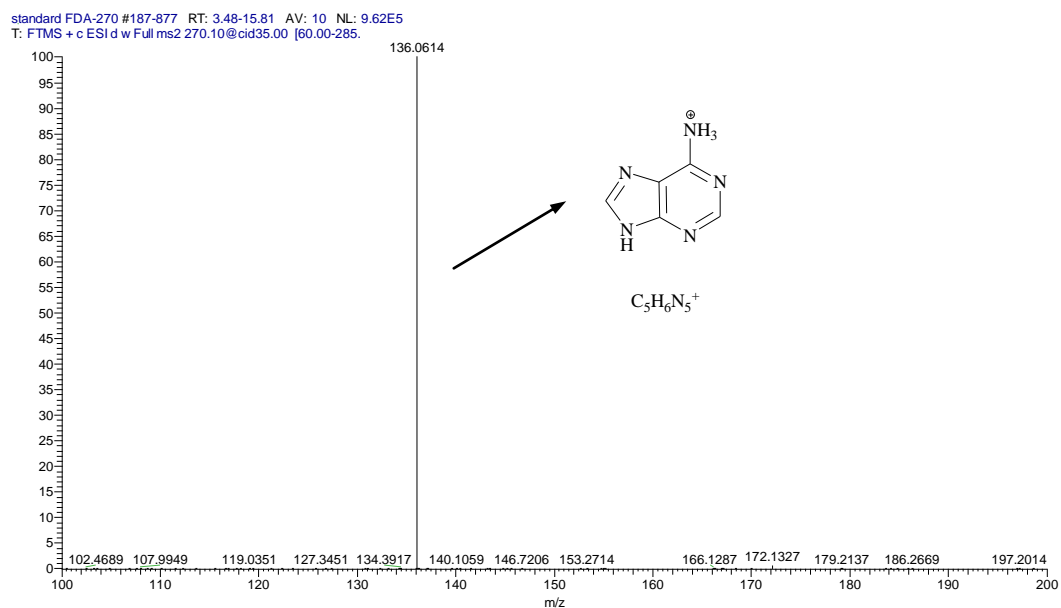

**SI Figure S8.** MSMS fragmentation analysis of the synthetic 5'-FDA

## Reference
